# Supplementary material for: Rif1 Regulates the Fate of DNA Entanglements during Mitosis
Source: PubMed Central journal article supplement — Cell Rep. 2016 Jun 16;16(1):148–60. doi: 10.1016/j.celrep.2016.05.077 (PMC4929174; doi:10.1016/j.celrep.2016.05.077), 2016-06-16
Supplement: mmc1.pdf [file mmc1.pdf]

**Cell Reports, Volume 16**

**Supplemental Information**

**Rif1 Regulates the Fate  
of DNA Entanglements during Mitosis**

**Sophie Zaaier, Nadeem Shaikh, Rishi Kumar Nageshan, and Julia Promisel Cooper**

# Figure S1

**A**

*taz1Δ* - 19°C - **Tpz1** **Histone H3**

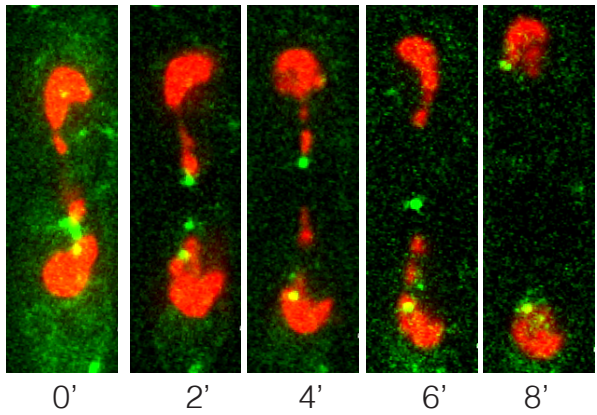

**B**

Pol $\alpha$  persistence in G2 cells

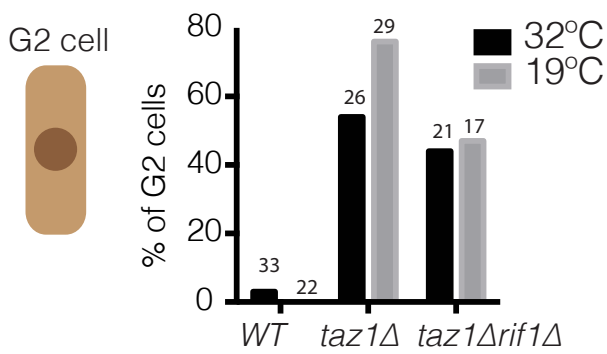

*taz1Δ* 19°C

**Pol $\alpha$**  **Histone H3**

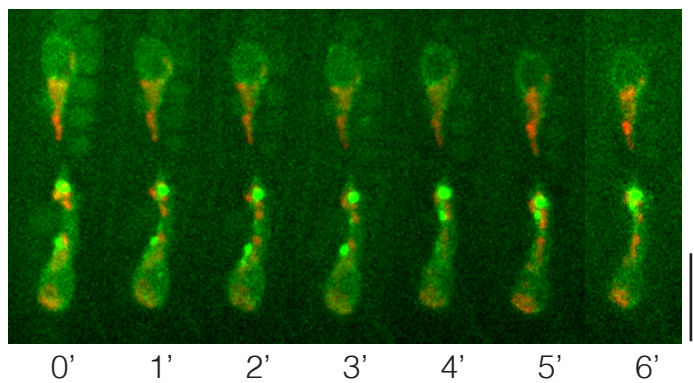

**C**

*taz1Δ* - 19°C **Rad52** **Histone H3**

wt-like

aberrant

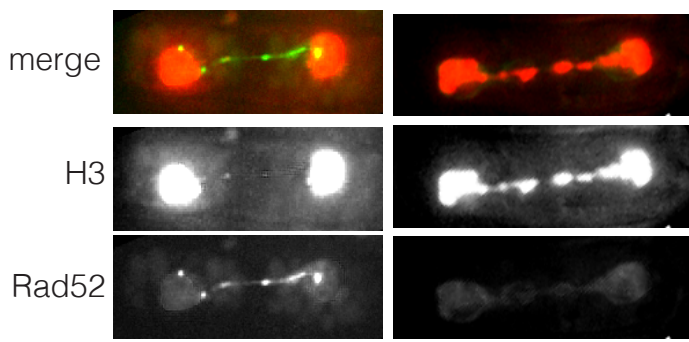

Rad52 presence in the midzone  
in *taz1Δ* cells

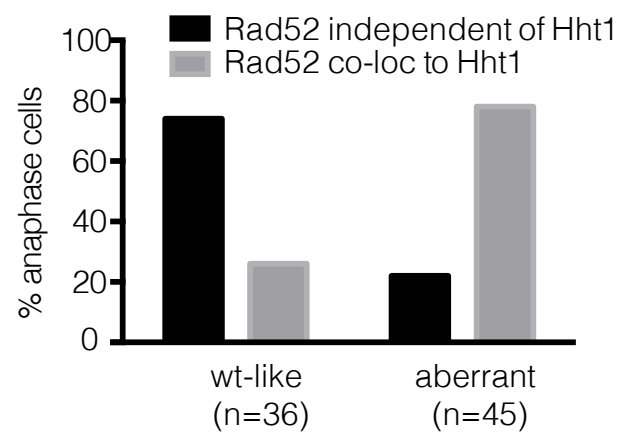

**Figure S1, related to Figure 3: DNA replication and repair proteins appear in the anaphase mid-region in a *taz1Δ* setting.**

A) Stills from a representative film of *taz1Δ* cells harboring endogenously tagged Tpz1-GFP and histone H3 as in Figure 1. Images were captured every 2 minutes through anaphase.

B) Cells harboring endogenously tagged Pol $\alpha$ -GFP and histone H3 were grown to log phase at 32°C, then shifted to 19°C for 24 hours. Left panel: percentage of G2 cells showing Pol $\alpha$  -GFP foci. Right panel: frames from film of a *taz1Δ* cell completing anaphase. Numbers below panels indicate time since filming began.

C) *taz1Δ* cells tagged at endogenous loci for Rad52 and histone H3 were followed through anaphase and categorized as showing either wt-like or aberrant chromosome segregation. Left: representative images. Right: Quantitation of presence of Rad52 between segregating chromosomes.

**Figure S2**

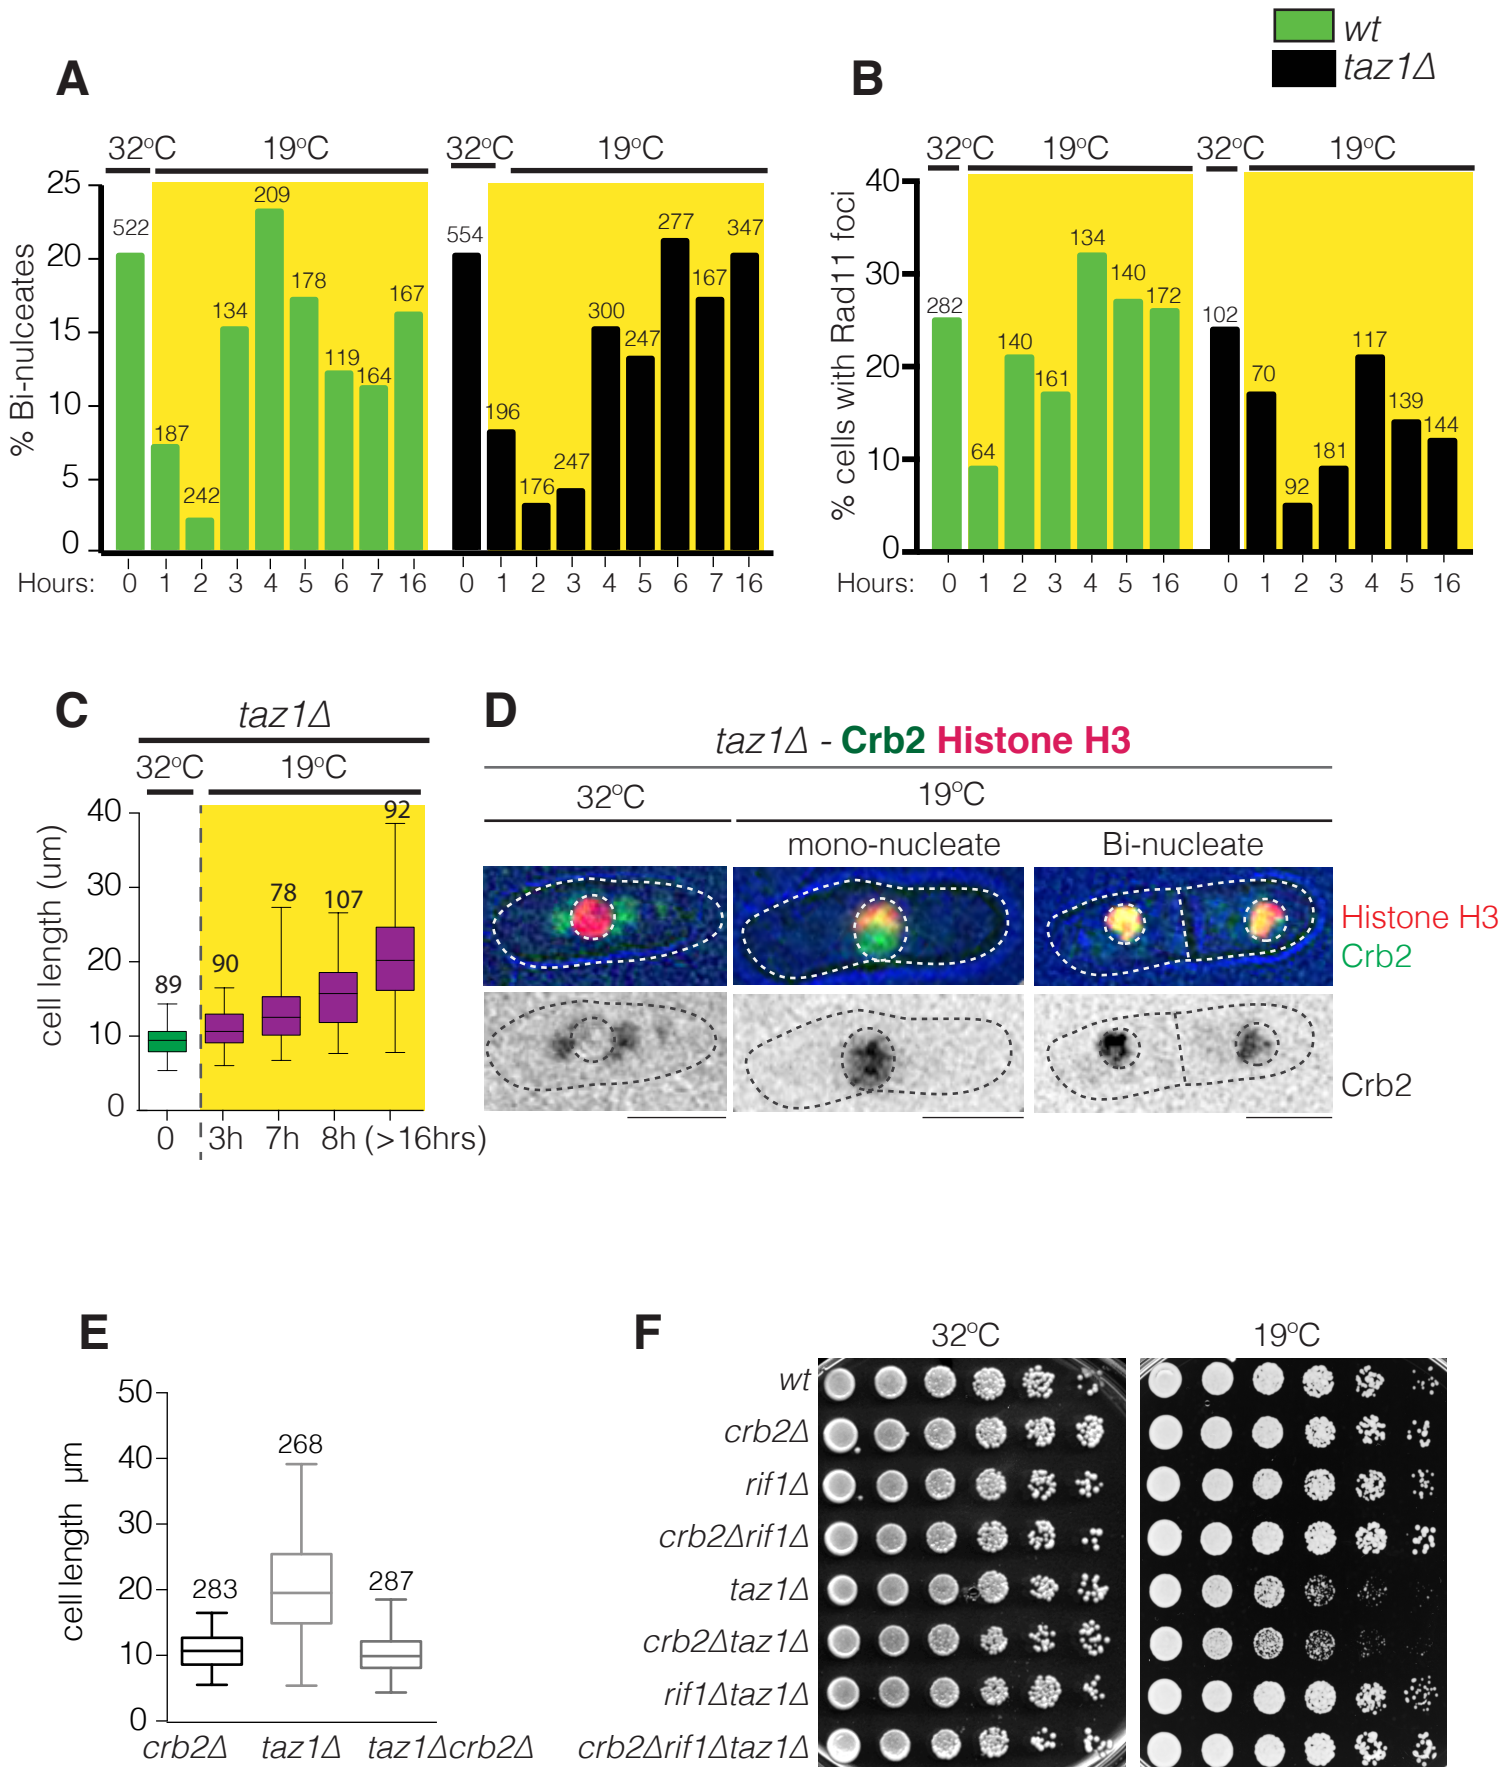

**Figure S2, related to Figure 4: *taz1*Δ cells trigger the Crb2<sup>53BP1</sup>-dependent checkpoint only in the second cell cycle following shift to cold temperature.**

A) Bi-nucleate status (indicative of G1/S phase) is monitored in *wt* and *taz1*Δ cultures. Numbers below the x-axis indicate hours after shift from 32°C to 19°C. See text for details.

B) The presence of Rad11<sup>RPA</sup>-GFP foci (indicative of S phase) is monitored as in (A).

C) *taz1*Δ cell length over time in the cold. Cells were grown to log phase at 32°C, then shifted to 19°C. X-axis labels indicate hours after the temperature shift.

D) Crb2<sup>53BP1</sup> localization is viewed in log phase at 32°C and >8 hours after shift to 19°C.

E) Cells grown to log-phase at 32°C were shifted to 19°C for 24 hours; then, cell lengths were measured.

F) Five-fold serial dilutions of log-phase cultures grown at 32°C were spotted onto rich medium and incubated at 32°C for 2 days or 19°C for 5 days.

# Figure S3

**A**

**Telomere end**

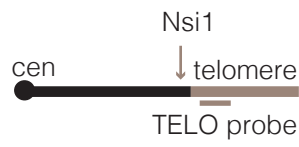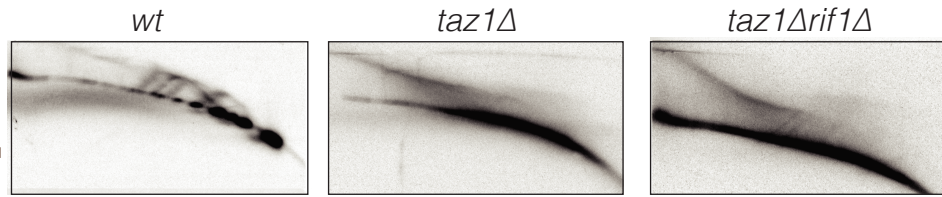

*rap1Δ*

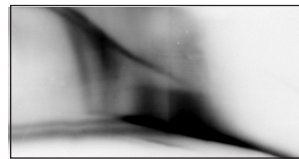

(Miller et al., 2006)

**B**

**Internal Telomere**

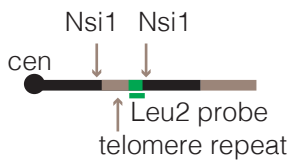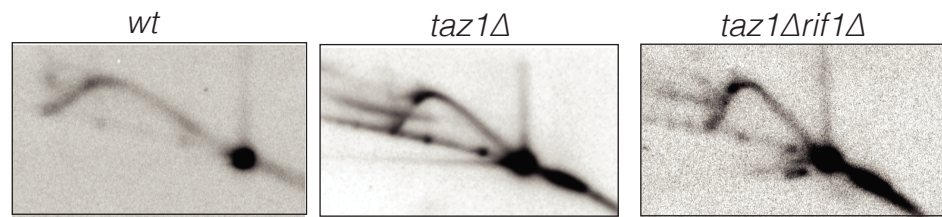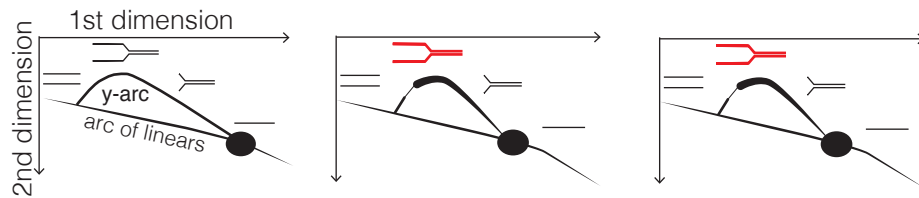

**Figure S3, related to Figure 4: Rif1 neither causes nor suppresses *taz1Δ* telomere replication defects.**

(A and B) Left: Diagrams indicating positions of Nsil restriction sites and probes. The internal telomere was constructed by inserting a cassette containing a synthetic telomere repeat tract and the *ScLEU2* gene at the *ura4+* locus on Chr III (Miller et al., 2006). Right: Southern blots of two-dimensional gels of Nsil fragments, hybridized with the telomere probe (A) or the Leu2 probe (B). Below each blot is an interpretive diagram.

A) While Y-arcs indicative of complete replication are seen for telomeric DNA isolated from *wt* cells, the corresponding arcs for *taz1Δ* telomeres fail to return to the arc of linears, indicating stalled, incomplete replication. *rap1Δ* telomeres are shown for comparison; while *rap1Δ* telomeres are long and heterogeneous, the corresponding Y-arcs both ascend and descend back to the arc of linears (*rap1Δ* image is re-printed from (Miller et al., 2006)).

B) The internal telomere was specifically assessed by hybridizing with a probe for *ScLEU2*. Prominent fork stalling is seen at this region in *taz1Δ* and *taz1Δrif1Δ* cells alike.

# Figure S4

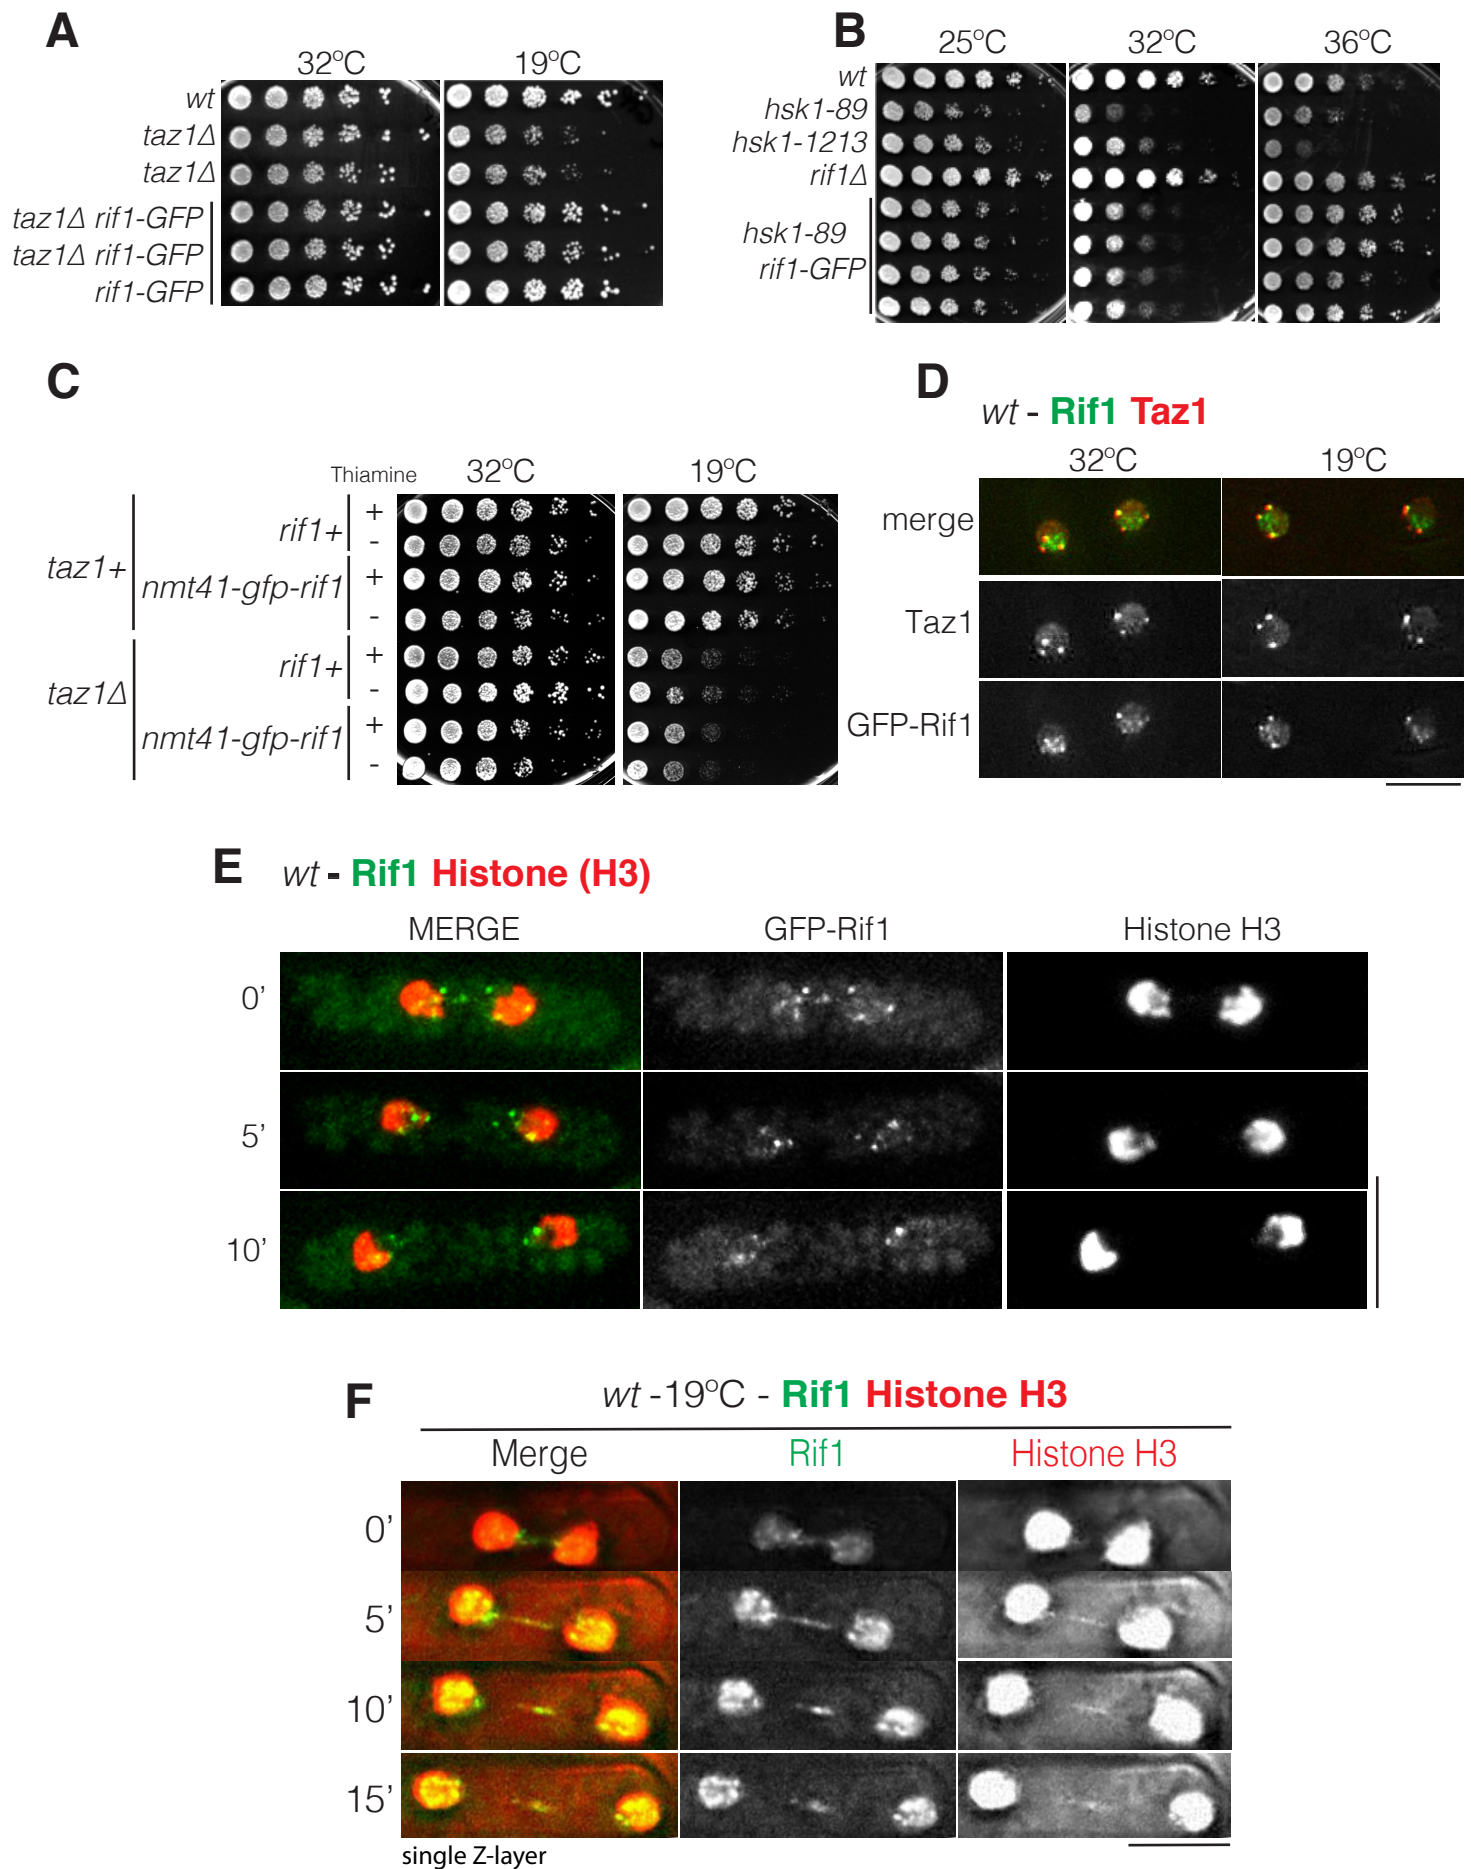



**Figure S4, related to Figure 5: Behavior of N- and C-terminally GFP tagged Rif1.**

A) Five-fold serial dilutions of log-phase cultures were spotted onto rich medium and incubated at 32°C for 2 days or 19°C for 5 days.

B) Serial dilutions were plated as in (A) and grown at 25°C for 5 days, or 32°C or 36°C for 2 days

C) Cells were maintained in log phase in minimal liquid media with or without 60  $\mu$ M thiamine (the absence of which confers induction of expression from the *nmt41* promoter) for 3 days at 32°C. Five-fold serial dilutions were then spotted onto rich media and incubated at 32°C for 2 days or 19°C for 5 days.

D) Representative images of G2-phase cells harboring endogenously tagged Taz1-mCherry and GFP-Rif1. Cells were grown to log phase at 32°C, then shifted to 19°C for 24 hours.

E) Frames from representative film of a cell as it progresses from G2 to anaphase at 32°C. No GFP-Rif1 is detected in the mid-region between segregating chromosomes. Compare with Figure 5A.

F) Frames from a representative film of a cell grown to log phase at 32°C, then shifted to 19°C for 24 hours. In contrast to all other microscopy images in which multiple stacks in Z-axis were collapsed into one, these images represent a single plane in the Z-axis.

# Figure S5

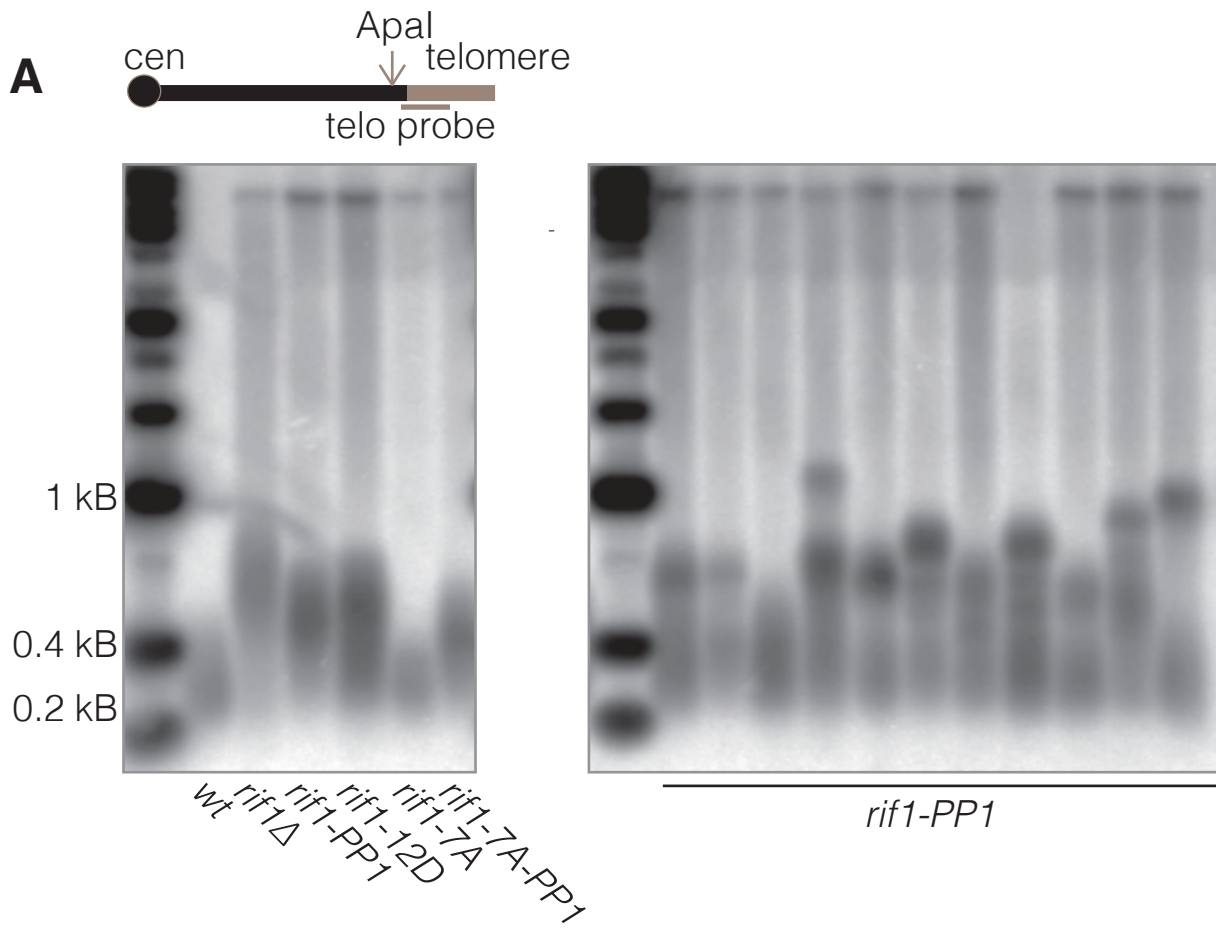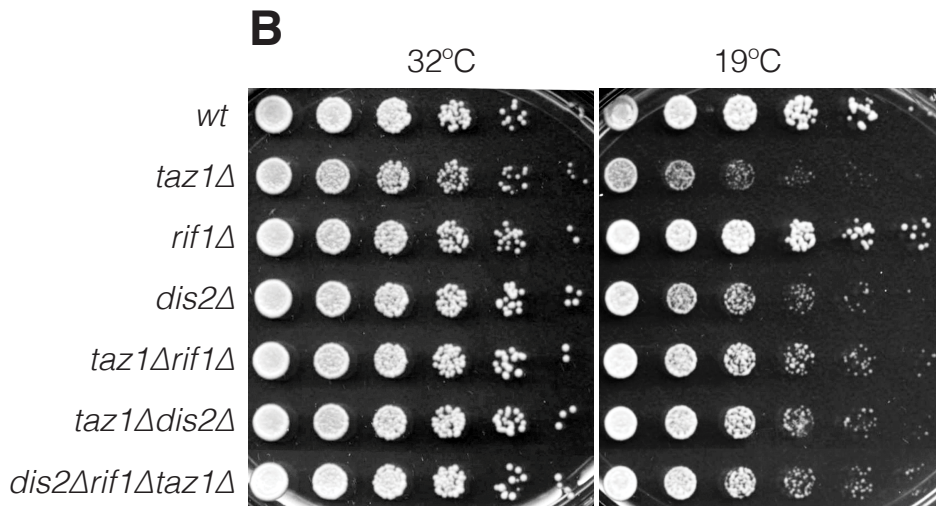

**Figure S5, related to Figure 6: The loss of Rif1's PP1-binding ability, or the loss of PP1 phosphatase, rescues *taz1Δ* cold sensitivity.**

A) Telomere lengths were analyzed by Southern blot analysis of Apa1 digested genomic DNA, hybridized with a telomere probe. The multiple *rif1-pp1* single clones in the right panel were constructed by crossing a *rif1Δ* strain against a *rif1-pp1* strain (Dave et al., 2014).

B) Five-fold serial dilutions of log-phase cultures were spotted onto rich medium and incubated at 32°C for 2 days or 19°C for 5 days. Dis2 is one of the two fission yeast PP1 phosphatases; see text for details.

### Supplemental Movie Legends:

Movie S1: Film (stills in Figure 1A), showing a *taz1Δ* cell, harboring fluorescent histone H3 (see Figure 1A) and grown at 19°C, with a “*wt*-like” chromosome segregation pattern.

Movie S2: Film of a *taz1Δ* cell tagged as in Figure 1A exhibiting the “pointing finger” segregation phenotype (see Figure 1A and text).

Movie S3: Film of a *taz1Δ* cell tagged as in Figure 1A demonstrating the “irreversibly entangled” segregation pattern (see Figure 1A and text).

Movie S4: Film (stills in Figure 3E) of *taz1Δ* cell carrying mRFP-tagged histone H3 and GFP-tagged RPA<sup>Rad11</sup>. This cell, grown at 19°C, shows a strand of RPA between segregating chromosomes retracting into one of the daughter nuclei.

Table S1. Strains constructed and analysed in this study

| JCF N° | Mating type                                   | Genotype                                                                                                                                                          | Origin             |
|--------|-----------------------------------------------|-------------------------------------------------------------------------------------------------------------------------------------------------------------------|--------------------|
| 11     | <i>h</i> <sup>+</sup>                         | <i>taz1::ura4<sup>+</sup> ade6-M216 leu1-32 ura4-D18</i>                                                                                                          | Lab Stock          |
| 108    | <i>h</i> <sup>-</sup>                         | <i>ade6-M210 his3-D1 leu1-32 ura4-D18</i>                                                                                                                         | Lab Stock          |
| 109    | <i>h</i> <sup>+</sup>                         | <i>ade6-M216 his3-D1 leu1-32 ura4-D18</i>                                                                                                                         | Lab Stock          |
| 282    | <i>h</i> <sup>-</sup>                         | <i>rif1::kanMX6 taz1::ura4<sup>+</sup> ade6-(M210 or M216) leu1-32 ura4-D18</i>                                                                                   | Lab Stock          |
| 300    | <i>h</i> <sup>-</sup>                         | <i>rif1::kanMX6 ade6-M216</i>                                                                                                                                     | Lab stock          |
| 481    | <i>h</i> <sup>-</sup>                         | <i>rif1-GFP:kanMX6</i>                                                                                                                                            | Lab Stock          |
| 1076   | <i>h</i> <sup>+</sup> / <i>h</i> <sup>-</sup> | <i>trt1<sup>+</sup>/trt1::hygMX6 ade6-M210/ade6-M216 his3-D1/his3-D1 leu1-32/leu1-32 ura4-D18/ura4-D18</i>                                                        | Lab Stock          |
| 1582   | <i>h</i> <sup>+</sup> / <i>h</i> <sup>-</sup> | <i>taz1::kanMX6/taz1::kanMX6 trt1<sup>+</sup>/trt1::his3 ade6-M210/ade6-M216 his3-D1/his3-D1 leu1-32/leu1-32 ura4-D18/ura4-D18</i>                                | Lab Stock          |
| 1675   | <i>h</i> <sup>+</sup>                         | <i>ura4::synthetic-telo (500bp) his3- leu1-32 ade6-(M210 or M216)</i>                                                                                             | Lab stock          |
| 1678   | <i>h</i> <sup>+</sup>                         | <i>ura4::synthetic-telo (500bp) taz1::kanMX6 his3- leu1-32 ade6-(M210 or M216)</i>                                                                                | Lab stock          |
| 1689   | <i>h</i> <sup>?</sup>                         | <i>ura4::synthetic-telo (500bp) rif1::kanMX6 taz1::hygMX6 his3- leu1-32 ade6-(M210 or M216)</i>                                                                   | Lab stock          |
| 2906   | <i>h</i> <sup>-</sup>                         | <i>lys1:kanMX6:nmt1:GFP-atb2 leu1-32 ura4-D18</i>                                                                                                                 | Nurse Lab (PN3774) |
| 4496   | <i>h</i> <sup>-</sup>                         | <i>hht1-mRFP:kanMX6 ade6-M210 leu1-32 ura4-D18 his3-D1</i>                                                                                                        | Lab stock          |
| 6382   | <i>h</i> <sup>-</sup>                         | <i>hsk1-1312 ade6-M216 leu1-32 ura4-D18</i>                                                                                                                       | Forsburg lab       |
| 9202   | <i>h</i> <sup>-</sup>                         | <i>crb2::ura4<sup>+</sup> ade6-M216 his3-D1 leu1-32 ura4-D18</i>                                                                                                  | This study         |
| 9203   | <i>h</i> <sup>+</sup>                         | <i>rif1::hygMX6 his3-D1 leu1-32 ura4-D18</i>                                                                                                                      | This study         |
| 9204   | <i>h</i> <sup>+</sup>                         | <i>crb2::ura4<sup>+</sup> rif1::hygMX6 ade6-M216 his3-D1 leu1-32 ura4-D18</i>                                                                                     | This study         |
| 9205   | <i>h</i> <sup>-</sup>                         | <i>taz1::natMX6 his3-D1 leu1-32 ura4-D18</i>                                                                                                                      | This study         |
| 9206   | <i>h</i> <sup>+</sup>                         | <i>taz1::natMX6 crb2::ura4<sup>+</sup> ade6-M216 his3-D1 leu1-32 ura4-D18</i>                                                                                     | This study         |
| 9207   | <i>h</i> <sup>?</sup>                         | <i>taz1::natMX6 rif1::hygMX6 ade6-M216 his3-D1 leu1-32 ura4-D18</i>                                                                                               | This study         |
| 9208   | <i>h</i> <sup>+</sup>                         | <i>taz1::natMX6 rif1::hygMX6 crb2::ura4<sup>+</sup> his3-D1 leu1-32 ura4-D18</i>                                                                                  | This study         |
| 9236   | <i>h</i> <sup>+</sup> / <i>h</i> <sup>-</sup> | <i>taz1::kanMX6/taz1::kanMX6 rif1+/rif1::hygMX6 trt1<sup>+</sup>/trt1::his3<sup>+</sup> ade6-M201/ade6-M216 his3-D1/his3-D1 leu1-32/leu1-32 ura4-D18/ura4-D18</i> | This study         |
| 9273   | <i>h</i> <sup>-</sup>                         | <i>rif1-GFP:kanMX6 taz1::hygMX6</i>                                                                                                                               | This study         |
| 9292   | <i>h</i> <sup>?</sup>                         | <i>hht1-mRFP:kanMX6 reb1-GFP:natMX6 taz1::hygMX6 leu1-32 ura4-D18 his3-D1</i>                                                                                     | This study         |
| 9298   | <i>h</i> <sup>-</sup>                         | <i>hht1-mRFP:kanMX6 taz1::hygMX6 ade6-M210 leu1-32 ura4-D18 his3-D1</i>                                                                                           | This study         |
| 9301   | <i>h</i> <sup>?</sup>                         | <i>hht1-mRFP:kanMX6 taz1-GFP:kanMX6 ade6-(M210 or M216) leu1-32 ura4-D18 his3-D1</i>                                                                              | This study         |
| 9306   | <i>h</i> <sup>-</sup>                         | <i>hht1-mRFP:kanMX6 taz1::hyg rif1::natMX6 ade6-M210 leu1-32 ura4-D18 his3-D1</i>                                                                                 | This study         |
| 9317   | <i>h</i> <sup>-</sup>                         | <i>kanMX6:nmt41:GFP-rif1 ade6-M210 his3-D1 leu1-32 ura4-D18</i>                                                                                                   | This study         |
| 9319   | <i>h</i> <sup>?</sup>                         | <i>kanMX6:nmt41:GFP-rif1 taz1::natMX6 ade6-M210 his3-D1 leu1-32 ura4-D18</i>                                                                                      | This study         |
| 9328   | <i>h</i> <sup>?</sup>                         | <i>rif1-GFP:kanMX6 hsk1-89:ura4<sup>+</sup></i>                                                                                                                   | This study         |
| 9339   | <i>h</i> <sup>?</sup>                         | <i>kanMX6:nmt41:GFP-rif1 taz1-mCherry:natMX6 ade6-(M210 or M216) his3-D1 leu1-32 ura4-D18</i>                                                                     | This study         |
| 9363   | <i>h</i> <sup>?</sup>                         | <i>ade6-216 leu1-32 lys1-131 ura4-D18 sod2[:kanMX6-ura4+-lacOp] his7+::lacI-GFP hht1-mRFP:kanMX6 taz1::natMX6</i>                                                 | This study         |
| 9375   | <i>h</i> <sup>+</sup>                         | <i>tpz1-GFP:kanMX6 hht1-mRFP:kanMX6 taz1::natMX6 his3-D1 leu1-32 ura4-D18</i>                                                                                     | This study         |
| 9378   | <i>h</i> <sup>?</sup>                         | <i>hht1-mRFP:kanMX6 rad11-GFP:kanMX6 taz1::hygMX6 ade6-M210 his3-D1 leu1-32 ura4-D18</i>                                                                          | This study         |

Table S1. Strains constructed and analysed in this study

|       |                       |                                                                                                     |             |
|-------|-----------------------|-----------------------------------------------------------------------------------------------------|-------------|
| 10368 | <i>h<sup>90</sup></i> | <i>z:NatR-P-adh131-tetR-tomato cnt2::TetO::ura4<sup>+</sup></i>                                     | Lab stock   |
| 11330 | <i>h<sup>-</sup></i>  | <i>hht1-mRFP:kanMX6 rad22-GFP:kanMX6 taz1::ura4<sup>+</sup> ade6-M210 his3-D1 leu1-32 ura4-D18</i>  | This study  |
| 11337 | <i>h<sup>+</sup></i>  | <i>crb2-D2::ura4<sup>+</sup> leu1-32::2xYFP-crb2:leu1+ ura4-D18 taz1::kanMX6 hht1-mRFP:kanMX6</i>   | This study  |
| 11357 | <i>h<sup>?</sup></i>  | <i>hht1-mRFP:kanMX6 kanMX6:nmt41-GFP-rif1 ade6-M216 his3-D1 leu1-32 ura4-D18</i>                    | This study  |
| 11382 | <i>h<sup>-</sup></i>  | <i>swi7-GFP:kanMX6 hht1-mRFP:kanMX6 his3-D1</i>                                                     | This study  |
| 11384 | <i>h<sup>+</sup></i>  | <i>swi7-GFP:kanMX6 hht1-mRFP:kanMX6 taz1::hygMX6 his3-D1 leu1-32</i>                                | This study  |
| 11394 | <i>h<sup>-</sup></i>  | <i>swi7-GFP:kanMX6 hht1-mRFP:kanMX6 taz1::hygMX6 rif1::natMX6 his3-D1</i>                           | This study  |
| 11429 | <i>h<sup>?</sup></i>  | <i>hht1-mRFP:kanMX6 kanMX6:nmt41-GFP-rif1 taz1::natMX6 ade6-(M210 or M216)</i>                      | This study  |
| 11475 | <i>h<sup>?</sup></i>  | <i>hht1-mRFP:kanMX6 rad11-GFP:kanMX6 taz1::hyg rif1::natMX6 ade6-(M210 his3-D1 leu1-32 ura4-D18</i> | This study  |
| 12320 | <i>h<sup>+</sup></i>  | <i>rif1-PP1 ade6-216 his3-D1 ura4-D18 leu1-32</i>                                                   | Bianchi lab |
| 12322 | <i>h<sup>-</sup></i>  | <i>rif1-12D ade6-216 his3-D1 ura4-D18 leu1-32</i>                                                   | Bianchi lab |
| 12323 | <i>h<sup>+</sup></i>  | <i>rif1-7a ade6-216 his3-D1 ura4-D18 leu1-32</i>                                                    | Bianchi lab |
| 12324 | <i>h<sup>-</sup></i>  | <i>rif1-7a-PP1 ade6-216 his3-D1 ura4-D18 leu1-32</i>                                                | Bianchi lab |
| 12333 | <i>h<sup>-</sup></i>  | <i>taz1::kanMX6 rif1-PP1 his3-D1</i>                                                                | This study  |
| 12361 | <i>h<sup>?</sup></i>  | <i>hht1-mRFP:kanMX6 rad11-GFP:kanMX6 ade6-M210 ura4-D18</i>                                         | This study  |
| 12372 | <i>h<sup>?</sup></i>  | <i>rif1-PP1 z:NatR-Padh131-TetR-tomato cnt2::TetO*2::ura4 ura4-D18</i>                              | This study  |
| 12373 | <i>h<sup>90</sup></i> | <i>rif1::hygMX6 z:NatR-Padh131-TetR-tomato cnt2::TetO*2::ura4 ura4-D18</i>                          | This study  |
| 12374 | <i>h<sup>?</sup></i>  | <i>rif1::hygMX6 z:NatR-Padh131-TetR-tomato cnt2::TetO*2::ura4 ura4-D18</i>                          | This study  |
| 12392 | <i>h<sup>?</sup></i>  | <i>z:NatR-Padh131-TetR-tomato</i>                                                                   | This study  |
| 13431 | <i>h<sup>+</sup></i>  | <i>rif1::bsd hsk1-89:ura4+ ura4-D18 leu1-32</i>                                                     | Bianchi lab |
| 13433 | <i>h<sup>-</sup></i>  | <i>hsk1-89:ura4<sup>+</sup> ura4-D18 leu1-32</i>                                                    | Bianchi lab |
| 13524 | <i>h<sup>?</sup></i>  | <i>hht1-mRFP:kanMX6 reb1-GFP:natMX6 leu1-32 ura4-D18 his3-D1</i>                                    | This study  |
| 13546 | <i>h<sup>-</sup></i>  | <i>pcdt1-rif1 ura4-D18 leu1-32 ade6-M210 his3-D1</i>                                                | This study  |
| 13547 | <i>h<sup>-</sup></i>  | <i>pcdt1-rif1 ura4-D18 leu1-32 ade6-M210 his3-D1</i>                                                | This study  |
| 13579 | <i>h<sup>?</sup></i>  | <i>taz1::ura4<sup>+</sup> pcdt1-rif1 ade6-(M210 or M216) leu1-32 ura4-D18</i>                       | This study  |
| 13616 | <i>h<sup>+</sup></i>  | <i>taz1::ura4<sup>+</sup> pcdt1-rif1 ade6-M216 leu1-32 ura4-D18</i>                                 | This study  |
| 13632 | <i>h<sup>-</sup></i>  | <i>hsk1-89:ura4<sup>+</sup> pcdt1-rif1 ura4-D18 leu1-32</i>                                         | This study  |
| 13670 | <i>h<sup>?</sup></i>  | <i>pcdt1-rif1 z:NatR-Padh131-TetR-tomato cnt2::TetO*2::ura4 ura4-D18</i>                            | This study  |
| 13829 | <i>h<sup>-</sup></i>  | <i>rif1::hygMX6 ade6-M210 his3-D1 ura4-D18 leu1-32</i>                                              | This study  |
| 13831 | <i>h<sup>+</sup></i>  | <i>dis2::ura4+ ura4-D18 leu1-32 ade6-M216 his3-D1</i>                                               | This study  |
| 13835 | <i>h<sup>?</sup></i>  | <i>taz1::natMX6 rif1::hygMX6 ade6-M216 his3-D1 ura4-D18 leu1-32</i>                                 | This study  |
| 13837 | <i>h<sup>-</sup></i>  | <i>dis2::ura4<sup>+</sup> taz1::natMX6 ura4-D18 leu1-32</i>                                         | This study  |
| 13840 | <i>h<sup>-</sup></i>  | <i>dis2::ura4<sup>+</sup> rif1::hygMX6 ade6-M216 his3-D1 ura4-D18 leu1-32</i>                       | This study  |
| 13843 | <i>h<sup>-</sup></i>  | <i>dis2::ura4<sup>+</sup> rif1::hygMX6 taz1::natMX6 ade6-M216 his3-D1 ura4-D18 leu1-32</i>          | This study  |
| 13846 | <i>h<sup>?</sup></i>  | <i>taz1::natMX6 ade6-M216 his3-D1 ura4-D18 leu1-32</i>                                              | This study  |

## **Supplemental Experimental Procedures**

### **Strains and media**

Media and growth conditions were as previously described (Moreno et al., 1991). Strains are listed in Table S1. Single gene deletions and tag insertions were generated as described (Bahler et al., 1998) and used to create further strains through crossing and sporulation. The *taz1Δ rif1-pp1* clones were generated by crossing a *taz1Δrif1Δ* strain to a *rif1-pp1* strain; single *taz1Δ rif1-PP1* clones were selected.

### **Molecular Biology Techniques**

Southern blot and two-dimensional gel electrophoresis were performed as previously described (Miller et al., 2006) using described probes (Rog et al., 2009).

### **qRT PCR:**

RNA was harvested from cultures using MasterPure Yeast RNA Purification kit as described in the manufacturer's protocol (Epicentre). cDNA was generated using 2 $\mu$ g RNA, oligo dT primers and Superscript III Reverse Transcriptase kit (ThermoFisher). Transcripts were quantified using EXPRESS SYBR GreenER (ThermoFisher) and the StepOnePlus Real-Time PCR System (ThermoFisher). Primer specificity was confirmed by both melting-curve analysis and agarose gel electrophoresis of PCR products. Transcript levels for *rif1+* were analyzed by the standard curve method and normalized to *act1+* transcript levels.

### **Live Cell Microscopy**

Cells were adhered to 35-mm glass culture dishes (MatTek Corporation) using 0.2 mg/ml of soybean lectin (Sigma-Aldrich) and immersed in YES, or alternatively places on solid media pads (2% agarose melted in YES) on glass slides, with a coverslip sealed on top.

Time-lapse imaging was performed at 27°C in an Environmental Chamber with a DeltaVision Spectris (Applied Precision) comprising a widefield inverted epifluorescence microscope (IX70; Olympus), a 100x NA 1.4 oil immersion objective (UPlanSapo; Olympus), and a charge coupled device CoolSnap HQ camera (Photometrics). Images were acquired over 20 focal planes at a 0.2µm step size with frames taken at different time points. Images were deconvolved (conserved ratio method) and combined into a 2D image using the maximum intensity projection setting for analysis using SoftWorx (Applied Precision). Structural Illumination microscopy was carried out using a DeltaVision OMX (Applied Precision) comprising an OMX optical microscope (version 4), an Olympus PLAPON60xO, NA 1.42, oil immersion objective, and a sCMOS camera.

### **Supplemental References**

Bahler, J., Wu, J.Q., Longtine, M.S., Shah, N.G., McKenzie, A., 3rd, Steever, A.B., Wach, A., Philippsen, P., and Pringle, J.R. (1998). Heterologous modules for efficient and versatile PCR-based gene targeting in *Schizosaccharomyces pombe*. *Yeast* 14, 943-951.

Moreno, S., Klar, A., and Nurse, P. (1991). Molecular genetic analysis of fission yeast *Schizosaccharomyces pombe*. *Methods Enzymol* 194, 795-823.
